# Supplementary material for: Chronic critical illness after hypothermia in trauma patients
Source: HighWire-hosted journal article supplement (doi:10.1136/tsaco-2021-000747), 2021-07-01
Supplement: tsaco-2021-000747supp001_data_supplement.pdf [file tsaco-2021-000747supp001_data_supplement.pdf]

### Supplemental Table 1: Regression modeling of chronic critical illness including interaction terms between hypothermia, coagulopathy, and shock.

| Variable                            | Odds Ratio | 95% CI      | p-value |
|-------------------------------------|------------|-------------|---------|
| Hypothermia                         | 1.62       | 0.68 – 3.88 | 0.277** |
| Shock                               | 1.27       | 0.94 – 1.71 | 0.124** |
| Coagulopathy                        | 1.75       | 1.02 – 3.01 | 0.042** |
| Hypothermia & Shock                 | 1.04       | 0.39 – 2.84 | 0.926** |
| Hypothermia & Coagulopathy          | 0.53       | 0.12 – 2.32 | 0.401** |
| Shock & Coagulopathy                | 1.19       | 0.64 – 2.22 | 0.588** |
| Hypothermia, Shock and Coagulopathy | 1.86       | 0.36 – 9.51 | 0.456** |
| Age (years)                         | 1.03       | 1.02 – 1.04 | <0.001  |
| Male sex                            | 1.33       | 1.04 – 1.69 | 0.021   |
| BMI                                 | 1.05       | 1.03 – 1.07 | <0.001  |
| Injury Severity Score               | 1.06       | 1.05 – 1.07 | <0.001  |
| Study site                          |            |             |         |
| 1 (n=4)                             | ---        |             |         |
| 2 (n=52)                            | 1.84       | 0.93 – 3.62 | 0.08    |
| 3 (n=715)                           | 0.62       | 0.44 – 0.89 | 0.01    |
| 4 (n=387)                           | 1.32       | 0.9 – 1.92  | 0.154   |
| 5 (n=21)                            | 1.38       | 0.51 – 3.72 | 0.527   |
| 6 (n=5)                             | ---        |             |         |
| 7 (n=196)                           | 0.97       | 0.62 – 1.5  | 0.877   |
| 8 (n=32)                            | 2.78       | 1.12 – 6.89 | 0.027   |
| 9 (n=263)                           | Reference  |             |         |

\*\* Marginal linear predictions for interactions terms: hypothermia: 0.102, shock: 0.016, coagulopathy: 0.024, hypothermia & shock: 0.391, hypothermia & coagulopathy: 0.439, shock & coagulopathy: 0.247, hypothermia, shock and coagulopathy: 0.456

### Supplemental Table 2. Probeset Identification

|    | ProbeSet  | Anno-tations         | Name                                                                                                                                                                         | Symbol                     | EntrezID                        |
|----|-----------|----------------------|------------------------------------------------------------------------------------------------------------------------------------------------------------------------------|----------------------------|---------------------------------|
| 1  | TC0100678 | <a href="#">Info</a> | interferon-induced protein 44-like                                                                                                                                           | <a href="#">IFI44L</a>     | <a href="#">10964</a>           |
| 2  | TC0100679 | <a href="#">Info</a> | interferon-induced protein 44                                                                                                                                                | <a href="#">IFI44</a>      | <a href="#">10561</a>           |
| 3  | TC0101701 | <a href="#">Info</a> | olfactory receptor, family 2, subfamily W, member 3                                                                                                                          | <a href="#">OR2W3</a>      | <a href="#">343171</a>          |
| 4  | TC0102415 | <a href="#">Info</a> | guanylate binding protein 1, interferon-inducible, 67kDa                                                                                                                     | <a href="#">GBP1</a>       | <a href="#">2633</a>            |
| 5  | TC0102418 | <a href="#">Info</a> | guanylate binding protein 4                                                                                                                                                  | <a href="#">GBP4</a>       | <a href="#">115361</a>          |
| 6  | TC0102419 | <a href="#">Info</a> | guanylate binding protein 5                                                                                                                                                  | <a href="#">GBP5</a>       | <a href="#">115362</a>          |
| 7  | TC0102747 | <a href="#">Info</a> | selenium binding protein 1                                                                                                                                                   | <a href="#">SELENBP1</a>   | <a href="#">8991</a>            |
| 8  | TC0200996 | <a href="#">Info</a> | amyotrophic lateral sclerosis 2 (juvenile) chromosome region, candidate 2                                                                                                    | <a href="#">ALS2CR2</a>    | <a href="#">650168 // 55437</a> |
| 9  | TC0401299 | <a href="#">Info</a> | glycophorin A (MNS blood group) /// Glycophorin A precursor (PAS-2) (Sialoglycoprotein alpha) (MN sialoglycoprotein) (CD235a antigen). [Source:Uniprot/SWISSPROT;Acc:P02724] | <a href="#">GYPA</a>       | <a href="#">2993</a>            |
| 10 | TC0601160 | <a href="#">Info</a> | HLA class II histocompatibility antigen, DQB1*0602 beta chain precursor (DQ(5)) (DC-1). [Source:Uniprot/SWISSPROT;Acc:P03992]                                                | <a href="#">HB25_HUMAN</a> |                                 |
| 11 | TC0801077 | <a href="#">Info</a> | carbonic anhydrase 1                                                                                                                                                         | <a href="#">CA1</a>        | <a href="#">759</a>             |
| 12 | TC0X00960 | <a href="#">Info</a> | aminolevulinate, delta-, synthase 2                                                                                                                                          | <a href="#">ALAS2</a>      | <a href="#">212</a>             |
| 13 | TC1000428 | <a href="#">Info</a> | interferon-induced protein with tetratricopeptide repeats 1-like                                                                                                             | <a href="#">IFIT1L</a>     | <a href="#">439996</a>          |
| 14 | TC1000429 | <a href="#">Info</a> | interferon-induced protein with tetratricopeptide repeats 1                                                                                                                  | <a href="#">IFIT1</a>      | <a href="#">3434</a>            |
| 15 | TC1001009 | <a href="#">Info</a> | early growth response 2 (Krox-20 homolog, Drosophila)                                                                                                                        | <a href="#">EGR2</a>       | <a href="#">1959</a>            |
| 16 | TC1300438 | <a href="#">Info</a> | epithelial stromal interaction 1 (breast)                                                                                                                                    | <a href="#">EPST11</a>     | <a href="#">94240</a>           |
| 17 | TC1600365 | <a href="#">Info</a> | erythroid associated factor                                                                                                                                                  | <a href="#">ERAF</a>       | <a href="#">51327</a>           |

|    |           |                      |                                                                                                                                                                                                                                                                                                                       |                                       |                               |
|----|-----------|----------------------|-----------------------------------------------------------------------------------------------------------------------------------------------------------------------------------------------------------------------------------------------------------------------------------------------------------------------|---------------------------------------|-------------------------------|
| 18 | TC1701422 | <a href="#">Info</a> | solute carrier family 4, anion exchanger, member 1 (erythrocyte membrane protein band 3, Diego blood group) /// Band 3 anion transport protein (Anion exchange protein 1) (AE 1) (Solute carrier family 4 member 1) (CD233 antigen). [Source:Uniprot/SWISSPROT;Acc:P02730]                                            | <a href="#">SLC4A1</a>                | <a href="#">6521</a>          |
| 19 | TC1800163 | <a href="#">Info</a> | solute carrier family 14 (urea transporter), member 1 (Kidd blood group)                                                                                                                                                                                                                                              | <a href="#">SLC14A1</a>               | <a href="#">6563</a>          |
| 20 | TC1800500 | <a href="#">Info</a> | ferrochelatase (protoporphyrin)                                                                                                                                                                                                                                                                                       | <a href="#">FECH</a>                  | <a href="#">2235</a>          |
| 21 | TC0900421 | <a href="#">Info</a> | tropomodulin 1 /// Tropomodulin-1 (Erythrocyte tropomodulin) (E-Tmod). [Source:Uniprot/SWISSPROT;Acc:P28289]                                                                                                                                                                                                          | <a href="#">TMOD1</a>                 | <a href="#">7111</a>          |
| 22 | TC1500884 | <a href="#">Info</a> | erythrocyte membrane protein band 4.2                                                                                                                                                                                                                                                                                 | <a href="#">EPB42</a>                 | <a href="#">2038</a>          |
| 23 | TC0401135 | <a href="#">Info</a> | tetraspanin 5                                                                                                                                                                                                                                                                                                         | <a href="#">TSPAN5</a>                | <a href="#">10098</a>         |
| 24 | TC0700721 | <a href="#">Info</a> | 2,3-bisphosphoglycerate mutase                                                                                                                                                                                                                                                                                        | <a href="#">BPGM</a>                  | <a href="#">669</a>           |
| 25 | TC0202181 | <a href="#">Info</a> | signal transducer and activator of transcription 1, 91kDa                                                                                                                                                                                                                                                             | <a href="#">STAT1</a>                 | <a href="#">6772</a>          |
| 26 | TC0301667 | <a href="#">Info</a> | purinergic receptor P2Y, G-protein coupled, 14                                                                                                                                                                                                                                                                        | <a href="#">P2RY14</a>                | <a href="#">9934</a>          |
| 27 | TC1700546 | <a href="#">Info</a> | myosin, light chain 4, alkali; atrial, embryonic                                                                                                                                                                                                                                                                      | <a href="#">MYL4</a>                  | <a href="#">4635</a>          |
| 28 | TC0401298 | <a href="#">Info</a> | glycophorin B (MNS blood group) /// Glycophorin HeP2 (Fragment). [Source:Uniprot/SPTREMBL;Acc:Q12832]                                                                                                                                                                                                                 | <a href="#">GYPB /// Q12832_HUMAN</a> | <a href="#">2994</a>          |
| 29 | TC0500182 | <a href="#">Info</a> | granzyme A (granzyme 1, cytotoxic T-lymphocyte-associated serine esterase 3)                                                                                                                                                                                                                                          | <a href="#">GZMA</a>                  | <a href="#">3001</a>          |
| 30 | TC0102413 | <a href="#">Info</a> | guanylate binding protein 3 /// Guanylate-binding protein 3 (GTP-binding protein 3) (Guanine nucleotide-binding protein 3) (GBP-3). [Source:Uniprot/SWISSPROT;Acc:Q9H0R5]                                                                                                                                             | <a href="#">GBP3</a>                  | <a href="#">2635</a>          |
| 31 | TC0401055 | <a href="#">Info</a> | chemokine (C-X-C motif) ligand 10                                                                                                                                                                                                                                                                                     | <a href="#">CXCL10</a>                | <a href="#">3627</a>          |
| 32 | TC0101197 | <a href="#">Info</a> | SLAM family member 7 /// SLAM family member 7 precursor (CD2-like receptor activating cytotoxic cells) (CRACC) (Protein 19A) (CD2 subset 1) (Novel Ly9) (Membrane protein FOAP-12) (CD319 antigen). [Source:Uniprot/SWISSPROT;Acc:Q9N2Q5]                                                                             | <a href="#">SLAMF7</a>                | <a href="#">57823</a>         |
| 33 | TC1000927 | <a href="#">Info</a> | membrane-associated ring finger (C3HC4) 8 /// E3 ubiquitin-protein ligase MARCH8 (EC 6.3.2.-) (Membrane-associated RING finger protein 8) (Membrane-associated RING-CH protein VIII) (MARCH-VIII) (RING finger protein 178) (Cellular modulator of immune recognition) (c-MIR). [Source:Uniprot/SWISSPROT;Acc:Q5T0T0] | <a href="#">8-Mar</a>                 | <a href="#">220972</a>        |
| 34 | TC1000426 | <a href="#">Info</a> | interferon-induced protein with tetratricopeptide repeats 2 /// Interferon-induced protein with tetratricopeptide repeats 2 (IFIT-2) (Interferon-induced 54 kDa protein) (IFI-54K) (ISG-54 K). [Source:Uniprot/SWISSPROT;Acc:P09913]                                                                                  | <a href="#">IFIT2</a>                 | <a href="#">3433</a>          |
| 35 | TC1101163 | <a href="#">Info</a> | CDNA FLJ13373 fis, clone PLACE1000749. [Source:Uniprot/SPTREMBL;Acc:Q9H8N5]                                                                                                                                                                                                                                           | <a href="#">GVIN1</a>                 |                               |
| 36 | TC0900862 | <a href="#">Info</a> | WD repeat domain 40A                                                                                                                                                                                                                                                                                                  | <a href="#">WDR40A</a>                | <a href="#">25853</a>         |
| 37 | TC1600452 | <a href="#">Info</a> | metallothionein 2A                                                                                                                                                                                                                                                                                                    | <a href="#">MT2A</a>                  | <a href="#">4502</a>          |
| 38 | TC0Y00071 | <a href="#">Info</a> | eukaryotic translation initiation factor 1A, Y-linked /// Eukaryotic translation initiation factor 1A, Y-chromosomal (eIF-1A Y isoform) (eIF-4C). [Source:Uniprot/SWISSPROT;Acc:O14602]                                                                                                                               | <a href="#">EIF1AY</a>                | <a href="#">9086</a>          |
| 39 | TC1100494 | <a href="#">Info</a> | retinoic acid receptor responder (tazarotene induced) 3 /// Retinoic acid receptor responder protein 3 (Tazarotene-induced gene 3 protein) (RAR-responsive protein TIG3) (Retinoid-inducible gene 1 protein). [Source:Uniprot/SWISSPROT;Acc:Q9UL19]                                                                   | <a href="#">RARRES3</a>               | <a href="#">5920</a>          |
| 40 | TC0100257 | <a href="#">Info</a> | chromosome 1 open reading frame 128 /// UPF0424 protein C1orf128. [Source:Uniprot/SWISSPROT;Acc:Q9GZP4]                                                                                                                                                                                                               | <a href="#">C1orf128</a>              | <a href="#">57095</a>         |
| 41 | TC1701425 | <a href="#">Info</a> | solute carrier family 25, member 39 /// Solute carrier family 25 member 39. [Source:Uniprot/SWISSPROT;Acc:Q9BZJ4]                                                                                                                                                                                                     | <a href="#">SLC25A39</a>              | <a href="#">51629</a>         |
| 42 | TC1001140 | <a href="#">Info</a> | ankyrin repeat domain 22                                                                                                                                                                                                                                                                                              | <a href="#">ANKRD22</a>               | <a href="#">118932</a>        |
| 43 | TC0901182 | <a href="#">Info</a> | hemogen                                                                                                                                                                                                                                                                                                               | <a href="#">HEMGN</a>                 | <a href="#">55363</a>         |
| 44 | TC2000390 | <a href="#">Info</a> | chromosome 20 open reading frame 108 /// Uncharacterized protein C20orf108. [Source:Uniprot/SWISSPROT;Acc:Q96KR6]                                                                                                                                                                                                     | <a href="#">C20orf108</a>             | <a href="#">116151</a>        |
| 45 | TC0701418 | <a href="#">Info</a> | sterile alpha motif domain containing 9-like                                                                                                                                                                                                                                                                          | <a href="#">SAMD9L</a>                | <a href="#">219285</a>        |
| 46 | TC0400312 | <a href="#">Info</a> | interleukin 8                                                                                                                                                                                                                                                                                                         | <a href="#">IL8</a>                   | <a href="#">3576</a>          |
| 47 | TC0800153 | <a href="#">Info</a> | solute carrier family 25, member 37 /// Mitoferrin-1 (Mitochondrial iron transporter 1) (Solute carrier family 25 member 37) (Mitochondrial solute carrier protein). [Source:Uniprot/SWISSPROT;Acc:Q9NYZ2]                                                                                                            | <a href="#">SLC25A37</a>              | <a href="#">51312</a>         |
| 48 | TC0401206 | <a href="#">Info</a> | calcium/calmodulin-dependent protein kinase (CaM kinase) II delta /// Calcium/calmodulin-dependent protein kinase type II delta chain (EC 2.7.11.17) (CaM-kinase II delta chain) (CaM kinase II subunit delta) (CaMK-II subunit delta). [Source:Uniprot/SWISSPROT;Acc:Q13557]                                         | <a href="#">CAMK2D</a>                | <a href="#">817</a>           |
| 49 | TC0100997 | <a href="#">Info</a> | Fc fragment of IgG, high affinity Ia, receptor (CD64)                                                                                                                                                                                                                                                                 | <a href="#">FCGR1A</a>                | <a href="#">2209</a>          |
| 50 | TC0401123 | <a href="#">Info</a> | synuclein, alpha (non A4 component of amyloid precursor)                                                                                                                                                                                                                                                              | <a href="#">SNCA</a>                  | <a href="#">6622</a>          |
| 51 | TC1700076 | <a href="#">Info</a> | XIAP associated factor 1 /// XIAP associated factor-1 isoform 2 [Source:RefSeq_peptide;Acc:NP_954590]                                                                                                                                                                                                                 | <a href="#">XAF1 /// NP_954590.1</a>  | <a href="#">54739</a>         |
| 52 | TC0301635 | <a href="#">Info</a> | procollagen-lysine, 2-oxoglutarate 5-dioxygenase 2                                                                                                                                                                                                                                                                    | <a href="#">PLOD2</a>                 | <a href="#">5352</a>          |
| 53 | TC0101700 | <a href="#">Info</a> | tripartite motif-containing 58                                                                                                                                                                                                                                                                                        | <a href="#">TRIM58</a>                | <a href="#">25893</a>         |
| 54 | TC1901627 | <a href="#">Info</a> | guanine nucleotide binding protein (G protein), gamma 8                                                                                                                                                                                                                                                               | <a href="#">GNGB8</a>                 | <a href="#">94235</a>         |
| 55 | TC0800769 | <a href="#">Info</a> | macrophage scavenger receptor 1                                                                                                                                                                                                                                                                                       | <a href="#">MSR1</a>                  | <a href="#">4481</a>          |
| 56 | TC1200714 | <a href="#">Info</a> | 2'-5'-oligoadenylate synthetase 2, 69/71kDa                                                                                                                                                                                                                                                                           | <a href="#">OAS2</a>                  | <a href="#">4939</a>          |
| 57 | TC0401297 | <a href="#">Info</a> | glycophorin E /// glycophorin E (GYPE), transcript variant 2, mRNA [Source:RefSeq_dna;Acc:NM_198682]                                                                                                                                                                                                                  | <a href="#">GYPE /// NM_198682.2</a>  | <a href="#">2996</a>          |
| 58 | TC1400923 | <a href="#">Info</a> | Full-length cDNA clone CS0DI006YN07 of Placenta of Homo sapiens (human). [Source:Uniprot/SPTREMBL;Acc:Q86TX6]                                                                                                                                                                                                         | <a href="#">Q86TX6_HUMAN</a>          |                               |
| 59 | TC0600055 | <a href="#">Info</a> | bone morphogenetic protein 6                                                                                                                                                                                                                                                                                          | <a href="#">BMP6</a>                  | <a href="#">654</a>           |
| 60 | TC0400120 | <a href="#">Info</a> | leucine aminopeptidase 3                                                                                                                                                                                                                                                                                              | <a href="#">LAP3</a>                  | <a href="#">51056</a>         |
| 61 | TC0Y00052 | <a href="#">Info</a> | DEAD (Asp-Glu-Ala-Asp) box polypeptide 3, Y-linked                                                                                                                                                                                                                                                                    | <a href="#">DDX3Y</a>                 | <a href="#">8653</a>          |
| 62 | TC0202052 | <a href="#">Info</a> | interferon induced with helicase C domain 1                                                                                                                                                                                                                                                                           | <a href="#">IFIH1</a>                 | <a href="#">64135</a>         |
| 63 | TC0601167 | <a href="#">Info</a> | major histocompatibility complex, class II, DM beta /// Major histocompatibility complex, class II, DM beta. [Source:Uniprot/SPTREMBL;Acc:Q5STC4]                                                                                                                                                                     | <a href="#">HLA-DMB /// NM_002118</a> | <a href="#">3109</a>          |
| 64 | TC0800132 | <a href="#">Info</a> | erythrocyte membrane protein band 4.9 (dematin) /// Dematin (Erythrocyte membrane protein band 4.9). [Source:Uniprot/SWISSPROT;Acc:Q08495]                                                                                                                                                                            | <a href="#">EPB49</a>                 | <a href="#">2039</a>          |
| 65 | TC1600007 | <a href="#">Info</a> | hemoglobin, alpha 2 /// hemoglobin, alpha 1                                                                                                                                                                                                                                                                           | <a href="#">HBA2 /// HBA1</a>         | <a href="#">3040 /// 3039</a> |
| 66 | TC0300556 | <a href="#">Info</a> | poly (ADP-ribose) polymerase family, member 14 /// Poly [ADP-ribose] polymerase 14 (EC 2.4.2.30) (PARP-14) (B aggressive lymphoma protein 2). [Source:Uniprot/SWISSPROT;Acc:Q460N5]                                                                                                                                   | <a href="#">PARP14</a>                | <a href="#">54625</a>         |
| 67 | TC0102199 | <a href="#">Info</a> | RNA, USD small nuclear (RNU5D) on chromosome 1 [Source:RefSeq_dna;Acc:NR_002755]                                                                                                                                                                                                                                      | <a href="#">NR_002755.2</a>           |                               |

|     |           |                      |                                                                                                                                                                                                                                                                                                                                                      |              |        |
|-----|-----------|----------------------|------------------------------------------------------------------------------------------------------------------------------------------------------------------------------------------------------------------------------------------------------------------------------------------------------------------------------------------------------|--------------|--------|
| 68  | TC0X00044 | <a href="#">Info</a> | toll-like receptor 7                                                                                                                                                                                                                                                                                                                                 | TLR7         | 51284  |
| 69  | TC0200019 | <a href="#">Info</a> | radical S-adenosyl methionine domain containing 2                                                                                                                                                                                                                                                                                                    | RSAD2        | 91543  |
| 70  | TC0601168 | <a href="#">Info</a> | major histocompatibility complex, class II, DM alpha // HLA class II histocompatibility antigen, DM alpha chain precursor (MHC class II antigen DMA). [Source:Uniprot/SWISSPROT;Acc:P28067]                                                                                                                                                          | HLA-DMA      | 3108   |
| 71  | TC0Y00011 | <a href="#">Info</a> | ribosomal protein S4, Y-linked 1                                                                                                                                                                                                                                                                                                                     | RPS4Y1       | 6192   |
| 72  | TC0100335 | <a href="#">Info</a> | erythrocyte membrane protein band 4.1 (elliptocytosis 1, RH-linked) // Protein 4.1 (Band 4.1) (P4.1) (EPB4.1) (4.1R). [Source:Uniprot/SWISSPROT;Acc:P11171]                                                                                                                                                                                          | EPB41        | 2035   |
| 73  | TC1700858 | <a href="#">Info</a> | CDNA FLJ26091 fis, clone RCT06468, (Fragment). [Source:Uniprot/SPTREMBL;Acc:Q6ZPC0]                                                                                                                                                                                                                                                                  | Q6ZPC0_HUMAN |        |
| 74  | TC0401035 | <a href="#">Info</a> | chemokine (C-X-C motif) ligand 5                                                                                                                                                                                                                                                                                                                     | CXCL5        | 6374   |
| 75  | TC0102609 | <a href="#">Info</a> | Fc fragment of IgG, high affinity Ib, receptor (CD64)                                                                                                                                                                                                                                                                                                | FCGR1B       | 2210   |
| 76  | TC0501272 | <a href="#">Info</a> | interferon regulatory factor 1                                                                                                                                                                                                                                                                                                                       | IRF1         | 3659   |
| 77  | TC1101503 | <a href="#">Info</a> | HRAS-like suppressor 3                                                                                                                                                                                                                                                                                                                               | HRASLS3      | 11145  |
| 78  | TC1201294 | <a href="#">Info</a> | signal transducer and activator of transcription 2, 113kDa                                                                                                                                                                                                                                                                                           | STAT2        | 6773   |
| 79  | TC0401076 | <a href="#">Info</a> | RasGEF domain family, member 1B                                                                                                                                                                                                                                                                                                                      | RASGEF1B     | 153020 |
| 80  | TC0600293 | <a href="#">Info</a> | major histocompatibility complex, class II, DR alpha // major histocompatibility complex, class II, DR alpha precursor [Source:RefSeq_peptide;Acc:NP_061984]                                                                                                                                                                                         | HLA-DRA      | 3122   |
| 81  | TC0901044 | <a href="#">Info</a> | aldehyde dehydrogenase 1 family, member A1 // Retinal dehydrogenase 1 (EC 1.2.1.36) (RALDH1) (RALDH 1) (Aldehyde dehydrogenase family 1 member A1) (Aldehyde dehydrogenase, cytosolic) (ALHD1) (ALDH-E1). [Source:Uniprot/SWISSPROT;Acc:P00352]                                                                                                      | ALDH1A1      | 216    |
| 82  | TC0701755 | <a href="#">Info</a> | transmembrane protein 176B // Transmembrane protein 176B (Protein LR8). [Source:Uniprot/SWISSPROT;Acc:Q3YBM2]                                                                                                                                                                                                                                        | TMEM176B     | 28959  |
| 83  | TC1201621 | <a href="#">Info</a> | RNA, U4C small nuclear (RNU4C) [Source:RefSeq_dna;Acc:NR_003137]                                                                                                                                                                                                                                                                                     | NR_003137.1  |        |
| 84  | TC0100881 | <a href="#">Info</a> | family with sequence similarity 46, member C                                                                                                                                                                                                                                                                                                         | FAM46C       | 54855  |
| 85  | TC1400470 | <a href="#">Info</a> | glutaredoxin 5                                                                                                                                                                                                                                                                                                                                       | GLRX5        | 51218  |
| 86  | TC1701714 | <a href="#">Info</a> | ubiquitin-conjugating enzyme E2O                                                                                                                                                                                                                                                                                                                     | UBE2O        | 63893  |
| 87  | TC0100489 | <a href="#">Info</a> | small nucleolar RNA, C/D box 46 (SNORD46) on chromosome 1 [Source:RefSeq_dna;Acc:NR_000024]                                                                                                                                                                                                                                                          | SNORD46      |        |
| 88  | TC0800196 | <a href="#">Info</a> | MSTP131. [Source:Uniprot/SPTREMBL;Acc:Q7Z2R7]                                                                                                                                                                                                                                                                                                        | Q7Z2R7_HUMAN |        |
| 89  | TC1600865 | <a href="#">Info</a> | G1 to S phase transition 1                                                                                                                                                                                                                                                                                                                           | GSPT1        | 2935   |
| 90  | TC0501035 | <a href="#">Info</a> | CD180 molecule                                                                                                                                                                                                                                                                                                                                       | CD180        | 4064   |
| 91  | TC0400390 | <a href="#">Info</a> | hect domain and RLD 5                                                                                                                                                                                                                                                                                                                                | HERC5        | 51191  |
| 92  | TC0401390 | <a href="#">Info</a> | DEAD (Asp-Glu-Ala-Asp) box polypeptide 60                                                                                                                                                                                                                                                                                                            | DDX60        | 55601  |
| 93  | TC0101820 | <a href="#">Info</a> | urotensin 2 // Urotensin-2 precursor (Urotensin-II) (U-II) (UII). [Source:Uniprot/SWISSPROT;Acc:O95399]                                                                                                                                                                                                                                              | UTS2         | 10911  |
| 94  | TC0103189 | <a href="#">Info</a> | YOD1 OTU deubiquitinating enzyme 1 homolog (S. cerevisiae) // Ubiquitin thioesterase OTU1 (EC 3.1.2.-) (OTU domain-containing protein 2) (HIV-1-induced protease 7) (HIN-7) (HSHIN7). [Source:Uniprot/SWISSPROT;Acc:Q5VVQ6]                                                                                                                          | YOD1         | 55432  |
| 95  | TC0600097 | <a href="#">Info</a> | guanosine monophosphate reductase                                                                                                                                                                                                                                                                                                                    | GMPR         | 2766   |
| 96  | TC0500516 | <a href="#">Info</a> | small nucleolar RNA, H/ACA box 74A (SNORA74A) on chromosome 5 [Source:RefSeq_dna;Acc:NR_002915]                                                                                                                                                                                                                                                      | SNORA74A     |        |
| 97  | TC1400736 | <a href="#">Info</a> | proteasome (prosome, macropain) activator subunit 2 (PA28 beta)                                                                                                                                                                                                                                                                                      | PSME2        | 5721   |
| 98  | TC0102981 | <a href="#">Info</a> | selectin P (granule membrane protein 140kDa, antigen CD62) // P-selectin precursor (Granule membrane protein 140) (GMP-140) (PADGEM) (Leukocyte-endothelial cell adhesion molecule 3) (LECAM3) (CD62P antigen). [Source:Uniprot/SWISSPROT;Acc:P16109]                                                                                                | SELP         | 6403   |
| 99  | TC2000307 | <a href="#">Info</a> | peptidase inhibitor 3, skin-derived (SKALP)                                                                                                                                                                                                                                                                                                          | PI3          | 5266   |
| 100 | TC0500581 | <a href="#">Info</a> | secretoglobin, family 3A, member 2                                                                                                                                                                                                                                                                                                                   | SCGB3A2      | 117156 |
| 101 | TC0601130 | <a href="#">Info</a> | lymphocyte antigen 6 complex, locus G6E (LY6G6E) on chromosome 6 [Source:RefSeq_dna;Acc:NR_003673]                                                                                                                                                                                                                                                   | LY6G6E       |        |
| 102 | TC1001167 | <a href="#">Info</a> | fer-1-like 3, myoferlin (C. elegans) // Myoferlin (Fer-1-like protein 3). [Source:Uniprot/SWISSPROT;Acc:Q9NZM1]                                                                                                                                                                                                                                      | FER1L3       | 26509  |
| 103 | TC0X00382 | <a href="#">Info</a> | G protein-coupled receptor 174                                                                                                                                                                                                                                                                                                                       | GPR174       | 84636  |
| 104 | TC0301382 | <a href="#">Info</a> | protein S (alpha)                                                                                                                                                                                                                                                                                                                                    | PROS1        | 5627   |
| 105 | TC1101130 | <a href="#">Info</a> | olfactory receptor, family 51, subfamily B, member 2                                                                                                                                                                                                                                                                                                 | OR51B2       | 79345  |
| 106 | TC0X01246 | <a href="#">Info</a> | muscleblind-like 3 (Drosophila) // Muscleblind-like protein 3 (Muscleblind-like X-linked protein) (Cys3His CCG1-required protein) (Protein HCHCR). [Source:Uniprot/SWISSPROT;Acc:Q9NUK0]                                                                                                                                                             | MBNL3        | 55796  |
| 107 | TC0901384 | <a href="#">Info</a> | chromosome 9 open reading frame 78 // Uncharacterized protein C9orf78 (Hepatocellular carcinoma-associated antigen 59). [Source:Uniprot/SWISSPROT;Acc:Q9NZ63]                                                                                                                                                                                        | C9orf78      | 51759  |
| 108 | TC0X00089 | <a href="#">Info</a> | family with sequence similarity 3, member C                                                                                                                                                                                                                                                                                                          | FAM3C        | 10447  |
| 109 | TC0500253 | <a href="#">Info</a> | methylcrotonyl-Coenzyme A carboxylase 2 (beta) // Methylcrotonyl-CoA carboxylase beta chain, mitochondrial precursor (EC 6.4.1.4) (3-methylcrotonyl-CoA carboxylase 2) (MCCase subunit beta) (3-methylcrotonyl-CoA:carbon dioxide ligase subunit beta) (3-methylcrotonyl-CoA carboxylase non-biotin-containing [Source:Uniprot/SWISSPROT;Acc:Q9HCC0] | MCCC2        | 64087  |
| 110 | TC0400115 | <a href="#">Info</a> | CD38 molecule                                                                                                                                                                                                                                                                                                                                        | CD38         | 952    |
| 111 | TC0701433 | <a href="#">Info</a> | pyruvate dehydrogenase kinase, isozyme 4                                                                                                                                                                                                                                                                                                             | PDK4         | 5166   |
| 112 | TC1101756 | <a href="#">Info</a> | Metastasis-related protein. [Source:Uniprot/SPTREMBL;Acc:Q9BX60]                                                                                                                                                                                                                                                                                     | Q9BX60_HUMAN |        |
| 113 | TC1300622 | <a href="#">Info</a> | similar to ribosomal protein S26                                                                                                                                                                                                                                                                                                                     | LOC441377    | 441377 |
| 114 | TC1600006 | <a href="#">Info</a> | hemoglobin, mu                                                                                                                                                                                                                                                                                                                                       | HBM          | 3042   |
| 115 | TC1200956 | <a href="#">Info</a> | killer cell lectin-like receptor subfamily B, member 1                                                                                                                                                                                                                                                                                               | KLRL1        | 3820   |
| 116 | TC1901553 | <a href="#">Info</a> | carcinoembryonic antigen-related cell adhesion molecule 1 (biliary glycoprotein) // Carcinoembryonic antigen-related cell adhesion molecule 1 precursor (Biliary glycoprotein 1) (BGP-1) (CD66 antigen) (CD66a antigen). [Source:Uniprot/SWISSPROT;Acc:P13688]                                                                                       | CEACAM1      | 634    |
| 117 | TC1500069 | <a href="#">Info</a> | small nucleolar RNA, C/D box 115-6 (SNORD115-6) on chromosome 15 [Source:RefSeq_dna;Acc:NR_003298]                                                                                                                                                                                                                                                   | NR_003298.1  |        |
| 118 | TC1700080 | <a href="#">Info</a> | arachidonate 12-lipoxygenase                                                                                                                                                                                                                                                                                                                         | ALOX12       | 239    |
| 119 | TC0102899 | <a href="#">Info</a> | absent in melanoma 2 // Interferon-inducible protein AIM2 (Absent in melanoma 2). [Source:Uniprot/SWISSPROT;Acc:O14862]                                                                                                                                                                                                                              | AIM2         | 9447   |
| 120 | TC2200571 | <a href="#">Info</a> | activating signal cointegrator 1 complex subunit 2                                                                                                                                                                                                                                                                                                   | ASCC2        | 84164  |

|     |           |                      |                                                                                                                                                                                                                                                                                                                                                                      |                                                        |                                              |
|-----|-----------|----------------------|----------------------------------------------------------------------------------------------------------------------------------------------------------------------------------------------------------------------------------------------------------------------------------------------------------------------------------------------------------------------|--------------------------------------------------------|----------------------------------------------|
| 121 | TC0101240 | <a href="#">Info</a> | pre-B-cell leukemia homeobox 1 // Pre-B-cell leukemia transcription factor 1 (Homeobox protein PBX1) (Homeobox protein PRL). [Source:Uniprot/SWISSPROT;Acc:P40424]                                                                                                                                                                                                   | <a href="#">PBX1</a>                                   | <a href="#">5087</a>                         |
| 122 | TC2200235 | <a href="#">Info</a> | apolipoprotein L, 6                                                                                                                                                                                                                                                                                                                                                  | <a href="#">APOL6</a>                                  | <a href="#">80830</a>                        |
| 123 | TC1101127 | <a href="#">Info</a> | hemoglobin, delta // hemoglobin, beta // Hemoglobin subunit beta (Hemoglobin beta chain) (Beta-globin). [Source:Uniprot/SWISSPROT;Acc:P68871]                                                                                                                                                                                                                        | <a href="#">HBB</a> // <a href="#">HBD</a>             | <a href="#">3045</a> // <a href="#">3043</a> |
| 124 | TC1101434 | <a href="#">Info</a> | glycine-N-acyltransferase-like 2                                                                                                                                                                                                                                                                                                                                     | <a href="#">GL_YATL2</a>                               | <a href="#">219970</a>                       |
| 125 | TC1300036 | <a href="#">Info</a> | Lymphocyte-specific protein 1 (Fragment). [Source:Uniprot/SPTREMBL;Acc:O43649]                                                                                                                                                                                                                                                                                       | <a href="#">O43649</a> HUMAN                           |                                              |
| 126 | TC0300101 | <a href="#">Info</a> | p300/CBP-associated factor                                                                                                                                                                                                                                                                                                                                           | <a href="#">PCAF</a>                                   | <a href="#">8850</a>                         |
| 127 | TC1701104 | <a href="#">Info</a> | small nucleolar RNA, C/D box 3B-1 (SNORD3B-1) on chromosome 17 [Source:RefSeq_dna;Acc:NR_003271]                                                                                                                                                                                                                                                                     | <a href="#">SNORD3B-1</a>                              |                                              |
| 128 | TC0401019 | <a href="#">Info</a> | immunoglobulin J polypeptide, linker protein for immunoglobulin alpha and mu polypeptides                                                                                                                                                                                                                                                                            | <a href="#">IGJ</a>                                    | <a href="#">3512</a>                         |
| 129 | TC0201431 | <a href="#">Info</a> | eukaryotic translation initiation factor 2-alpha kinase 2 // Interferon-induced, double-stranded RNA-activated protein kinase (EC 2.7.11.1) (Interferon-inducible RNA-dependent protein kinase) (Eukaryotic translation initiation factor 2-alpha kinase 2) (eIF-2A protein kinase 2) (Protein kinase RNA-activated) (PKR) ( [Source:Uniprot/SWISSPROT;Acc:P19525]   | <a href="#">EIF2AK2</a>                                | <a href="#">5610</a>                         |
| 130 | TC0600729 | <a href="#">Info</a> | small nucleolar RNA, H/ACA box 33 (SNORA33) on chromosome 6 [Source:RefSeq_dna;Acc:NR_002436]                                                                                                                                                                                                                                                                        | <a href="#">SNORA33</a>                                |                                              |
| 131 | TC0601343 | <a href="#">Info</a> | glutamate-cysteine ligase, catalytic subunit                                                                                                                                                                                                                                                                                                                         | <a href="#">GCLC</a>                                   | <a href="#">2729</a>                         |
| 132 | TC0301824 | <a href="#">Info</a> | insulin-like growth factor 2 mRNA binding protein 2                                                                                                                                                                                                                                                                                                                  | <a href="#">IGF2BP2</a>                                | <a href="#">10644</a>                        |
| 133 | TC0601170 | <a href="#">Info</a> | major histocompatibility complex, class II, DP alpha 1 // HLA class II histocompatibility antigen, DP alpha chain precursor (HLA-SB alpha chain) (MHC class II DP3-alpha) (DP(W3)) (DP(W4)). [Source:Uniprot/SWISSPROT;Acc:P20036]                                                                                                                                   | <a href="#">HLA-DPA1</a>                               | <a href="#">3113</a>                         |
| 134 | TC0800900 | <a href="#">Info</a> | ankyrin 1, erythrocytic // Ankyrin-1 (Erythrocyte ankyrin) (Ankyrin-R). [Source:Uniprot/SWISSPROT;Acc:P16157]                                                                                                                                                                                                                                                        | <a href="#">ANK1</a>                                   | <a href="#">286</a>                          |
| 135 | TC0400573 | <a href="#">Info</a> | ATP-binding cassette, sub-family E (OABP), member 1                                                                                                                                                                                                                                                                                                                  | <a href="#">ABCE1</a>                                  | <a href="#">6059</a>                         |
| 136 | TC2200225 | <a href="#">Info</a> | F-box protein 7                                                                                                                                                                                                                                                                                                                                                      | <a href="#">FBX07</a>                                  | <a href="#">25793</a>                        |
| 137 | TC1900010 | <a href="#">Info</a> | cell division cycle 34 homolog (S. cerevisiae)                                                                                                                                                                                                                                                                                                                       | <a href="#">CDC34</a>                                  | <a href="#">997</a>                          |
| 138 | TC0601314 | <a href="#">Info</a> | cysteine-rich secretory protein 3                                                                                                                                                                                                                                                                                                                                    | <a href="#">CRISP3</a>                                 | <a href="#">10321</a>                        |
| 139 | TC1901059 | <a href="#">Info</a> | chromosome 19 open reading frame 10                                                                                                                                                                                                                                                                                                                                  | <a href="#">C19orf10</a>                               | <a href="#">56005</a>                        |
| 140 | TC1400753 | <a href="#">Info</a> | granzyme B (granzyme 2, cytotoxic T-lymphocyte-associated serine esterase 1) // Granzyme B precursor (EC 3.4.21.79) (T-cell serine protease 1-3E) (Cytotoxic T-lymphocyte proteinase 2) (Lymphocyte protease) (SECT) (Granzyme-2) (Cathepsin G-like 1) (CTSL1) (CTLA-1) (Fragmentin-2) (Human lymphocyte protein) (HLP) (C11). [Source:Uniprot/SWISSPROT;Acc:P10144] | <a href="#">GZMB</a>                                   | <a href="#">3002</a>                         |
| 141 | TC1501031 | <a href="#">Info</a> | RNA binding protein with multiple splicing 2                                                                                                                                                                                                                                                                                                                         | <a href="#">RBPMS2</a>                                 | <a href="#">348093</a>                       |
| 142 | TC0200288 | <a href="#">Info</a> | galectin-related protein                                                                                                                                                                                                                                                                                                                                             | <a href="#">HSPC159</a>                                | <a href="#">29094</a>                        |
| 143 | TC0901011 | <a href="#">Info</a> | similar to HDCMB45P                                                                                                                                                                                                                                                                                                                                                  | <a href="#">LOC728601</a>                              | <a href="#">728601</a>                       |
| 144 | TC1100928 | <a href="#">Info</a> | Rho guanine nucleotide exchange factor (GEF) 12 // Rho guanine nucleotide exchange factor 12 (Leukemia-associated RhoGEF). [Source:Uniprot/SWISSPROT;Acc:Q9NZN5]                                                                                                                                                                                                     | <a href="#">ARHGEF12</a>                               | <a href="#">23365</a>                        |
| 145 | TC0200656 | <a href="#">Info</a> | glycophorin C (Gerbich blood group)                                                                                                                                                                                                                                                                                                                                  | <a href="#">GYPC</a>                                   | <a href="#">2995</a>                         |
| 146 | TC0300900 | <a href="#">Info</a> | coiled-coil domain containing 50                                                                                                                                                                                                                                                                                                                                     | <a href="#">CCDC50</a>                                 | <a href="#">152137</a>                       |
| 147 | TC0601188 | <a href="#">Info</a> | chromosome 6 open reading frame 125 // Uncharacterized protein C6orf125 (Breast cancer-associated protein SGA-81M). [Source:Uniprot/SWISSPROT;Acc:Q9BRT2]                                                                                                                                                                                                            | <a href="#">C6orf125</a>                               | <a href="#">84300</a>                        |
| 148 | TC1200754 | <a href="#">Info</a> | ring finger protein 10                                                                                                                                                                                                                                                                                                                                               | <a href="#">RNF10</a>                                  | <a href="#">9921</a>                         |
| 149 | TC1100954 | <a href="#">Info</a> | Seven transmembrane helix receptor. [Source:Uniprot/SPTREMBL;Acc:Q8NH82]                                                                                                                                                                                                                                                                                             | <a href="#">Q8NH82</a> HUMAN                           |                                              |
| 150 | TC1100793 | <a href="#">Info</a> | baculoviral IAP repeat-containing 3                                                                                                                                                                                                                                                                                                                                  | <a href="#">BIRC3</a>                                  | <a href="#">330</a>                          |
| 151 | TC0600080 | <a href="#">Info</a> | similar to ribosomal protein L15                                                                                                                                                                                                                                                                                                                                     | <a href="#">tcag7_350</a>                              | <a href="#">402694</a>                       |
| 152 | TC0601026 | <a href="#">Info</a> | histone cluster 1, H2bc // histone cluster 1, H2bg                                                                                                                                                                                                                                                                                                                   | <a href="#">HIST1H2BC</a> // <a href="#">HIST1H2BG</a> | <a href="#">8347</a> // <a href="#">8339</a> |
| 153 | TC1101775 | <a href="#">Info</a> | matrix metalloproteinase 1 (interstitial collagenase)                                                                                                                                                                                                                                                                                                                | <a href="#">MMP1</a>                                   | <a href="#">4312</a>                         |
| 154 | TC0300051 | <a href="#">Info</a> | Putative uncharacterized protein C3orf42 (NPC-related protein NAG73) (NAG-73). [Source:Uniprot/SWISSPROT;Acc:Q9BXV0]                                                                                                                                                                                                                                                 | <a href="#">C3orf42</a>                                |                                              |
| 155 | TC1000575 | <a href="#">Info</a> | MAX interactor 1 // MAX-interacting protein 1 (Protein MX1). [Source:Uniprot/SWISSPROT;Acc:P50539]                                                                                                                                                                                                                                                                   | <a href="#">MX1</a>                                    | <a href="#">4601</a>                         |
| 156 | TC2100142 | <a href="#">Info</a> | myxovirus (influenza virus) resistance 1, interferon-inducible protein p78 (mouse) // Interferon-induced GTP-binding protein Mx1 (Interferon-regulated resistance GTP-binding protein MxA) (Interferon-induced protein p78) (IFI-78K). [Source:Uniprot/SWISSPROT;Acc:P20591]                                                                                         | <a href="#">MX1</a>                                    | <a href="#">4599</a>                         |
| 157 | TC0103450 | <a href="#">Info</a> | olfactory receptor, family 2, subfamily M, member 7                                                                                                                                                                                                                                                                                                                  | <a href="#">OR2M7</a>                                  | <a href="#">391196</a>                       |
| 158 | TC0200412 | <a href="#">Info</a> | vesicle-associated membrane protein 8 (endobrevin)                                                                                                                                                                                                                                                                                                                   | <a href="#">VAMP8</a>                                  | <a href="#">8673</a>                         |
| 159 | TC1101113 | <a href="#">Info</a> | olfactory receptor, family 51, subfamily S, member 1                                                                                                                                                                                                                                                                                                                 | <a href="#">OR51S1</a>                                 | <a href="#">119692</a>                       |
| 160 | TC2200197 | <a href="#">Info</a> | oxysterol binding protein 2 // Oxysterol-binding protein 2 (Oxysterol-binding protein-related protein 4) (OSBP-related protein 4) (ORP-4). [Source:Uniprot/SWISSPROT;Acc:Q969R2]                                                                                                                                                                                     | <a href="#">OSBP2</a>                                  | <a href="#">23762</a>                        |
| 161 | TC1000427 | <a href="#">Info</a> | interferon-induced protein with tetratricopeptide repeats 3                                                                                                                                                                                                                                                                                                          | <a href="#">IFIT3</a>                                  | <a href="#">3437</a>                         |
| 162 | TC0200433 | <a href="#">Info</a> | CDNA FLJ141605 fis. clone CTONG3000896. [Source:Uniprot/SPTREMBL;Acc:Q6ZW50]                                                                                                                                                                                                                                                                                         | <a href="#">Q6ZW50</a> HUMAN                           |                                              |
| 163 | TC0700759 | <a href="#">Info</a> | taste receptor, type 2, member 4                                                                                                                                                                                                                                                                                                                                     | <a href="#">TAS2R4</a>                                 | <a href="#">50832</a>                        |
| 164 | TC2000250 | <a href="#">Info</a> | bactericidal/permeability-increasing protein // Bactericidal permeability-increasing protein precursor (BPI) (CAP 57). [Source:Uniprot/SWISSPROT;Acc:P17213]                                                                                                                                                                                                         | <a href="#">BPI</a>                                    | <a href="#">671</a>                          |
| 165 | TC1200959 | <a href="#">Info</a> | C-type lectin-like 1                                                                                                                                                                                                                                                                                                                                                 | <a href="#">CLECL1</a>                                 | <a href="#">160365</a>                       |
| 166 | TC0901049 | <a href="#">Info</a> | chromosome 9 open reading frame 40                                                                                                                                                                                                                                                                                                                                   | <a href="#">C9orf40</a>                                | <a href="#">55071</a>                        |
| 167 | TC0X00161 | <a href="#">Info</a> | G protein-coupled receptor 34 // Probable G-protein coupled receptor 34. [Source:Uniprot/SWISSPROT;Acc:Q9UPC5]                                                                                                                                                                                                                                                       | <a href="#">GPR34</a>                                  | <a href="#">2857</a>                         |
| 168 | TC1300415 | <a href="#">Info</a> | lipoma HMGIC fusion partner                                                                                                                                                                                                                                                                                                                                          | <a href="#">LHFP</a>                                   | <a href="#">10186</a>                        |
| 169 | TC0102490 | <a href="#">Info</a> | 40S ribosomal protein SA pseudogene                                                                                                                                                                                                                                                                                                                                  | <a href="#">RP11-556K13.1</a>                          | <a href="#">730029</a>                       |
| 170 | TC0202154 | <a href="#">Info</a> | NCK-associated protein 1                                                                                                                                                                                                                                                                                                                                             | <a href="#">NCKAP1</a>                                 | <a href="#">10787</a>                        |
| 171 | TC1401124 | <a href="#">Info</a> | tryptophanyl-tRNA synthetase                                                                                                                                                                                                                                                                                                                                         | <a href="#">WARS</a>                                   | <a href="#">7453</a>                         |

|     |           |                      |                                                                                                                                                                                                                                                                                                                                                        |                                              |                                      |
|-----|-----------|----------------------|--------------------------------------------------------------------------------------------------------------------------------------------------------------------------------------------------------------------------------------------------------------------------------------------------------------------------------------------------------|----------------------------------------------|--------------------------------------|
| 172 | TC1101916 | <a href="#">Info</a> | RNA, small nucleolar (LOC85389) on chromosome 11 [Source:RefSeq_dna;Acc:NR_001453]                                                                                                                                                                                                                                                                     | <a href="#">NR_001453.1</a>                  |                                      |
| 173 | TC0202359 | <a href="#">Info</a> | dedicator of cytokinesis 10 // Dedicator of cytokinesis protein 10 (Zizimin-3). [Source:Uniprot/SWISSPROT;Acc:Q96BY6]                                                                                                                                                                                                                                  | <a href="#">DOCK10</a>                       | <a href="#">55619</a>                |
| 174 | TC0800451 | <a href="#">Info</a> | lysosomal associated protein transmembrane 4 beta                                                                                                                                                                                                                                                                                                      | <a href="#">LAPTM4B</a>                      | <a href="#">729544 // 55353</a>      |
| 175 | TC1101752 | <a href="#">Info</a> | sestrin 3                                                                                                                                                                                                                                                                                                                                              | <a href="#">SESN3</a>                        | <a href="#">143686</a>               |
| 176 | TC0900661 | <a href="#">Info</a> | growth factor independent 1B transcription repressor // growth factor independent 1B (potential regulator of CDKN1A, translocated in CML) [Source:RefSeq_peptide;Acc:NP_004179]                                                                                                                                                                        | <a href="#">GF1B</a>                         | <a href="#">8328</a>                 |
| 177 | TC1200976 | <a href="#">Info</a> | cold shock domain protein A // DNA-binding protein A (Cold shock domain-containing protein A) (Single-strand DNA-binding protein NF-GMB). [Source:Uniprot/SWISSPROT;Acc:P16989]                                                                                                                                                                        | <a href="#">CSDA</a>                         | <a href="#">8531</a>                 |
| 178 | TC1901213 | <a href="#">Info</a> | peroxiredoxin 2 // Peroxiredoxin-2 (EC 1.11.1.15) (Thioredoxin peroxidase 1) (Thioredoxin-dependent peroxide reductase 1) (Thiol-specific antioxidant protein) (TSA) (PRP) (Natural killer cell-enhancing factor B) (NKEF-B). [Source:Uniprot/SWISSPROT;Acc:P32119]                                                                                    | <a href="#">PRDX2</a>                        | <a href="#">7001</a>                 |
| 179 | TC0201477 | <a href="#">Info</a> | CDNA FLJ44884 fis, clone BRAMY2037609. [Source:Uniprot/SPTREMBL;Acc:Q6ZT81]                                                                                                                                                                                                                                                                            | <a href="#">Q6ZT81_HUMAN</a>                 |                                      |
| 180 | TC0701687 | <a href="#">Info</a> | makorin, ring finger protein, 1                                                                                                                                                                                                                                                                                                                        | <a href="#">MKRN1</a>                        | <a href="#">23608</a>                |
| 181 | TC1100710 | <a href="#">Info</a> | similar to 40S ribosomal protein S28                                                                                                                                                                                                                                                                                                                   | <a href="#">LOC650788</a>                    | <a href="#">650788</a>               |
| 182 | TC1700689 | <a href="#">Info</a> | chromosome 17 open reading frame 60                                                                                                                                                                                                                                                                                                                    | <a href="#">C17orf60</a>                     | <a href="#">284021</a>               |
| 183 | TC0102037 | <a href="#">Info</a> | interferon, alpha-inducible protein 6                                                                                                                                                                                                                                                                                                                  | <a href="#">IFI6</a>                         | <a href="#">2537</a>                 |
| 184 | TC0301118 | <a href="#">Info</a> | chemokine (C-X3-C motif) receptor 1                                                                                                                                                                                                                                                                                                                    | <a href="#">CX3CR1</a>                       | <a href="#">1524</a>                 |
| 185 | TC0X00141 | <a href="#">Info</a> | X-linked Kx blood group (McLeod syndrome)                                                                                                                                                                                                                                                                                                              | <a href="#">XK</a>                           | <a href="#">7504</a>                 |
| 186 | TC1900108 | <a href="#">Info</a> | neurturin                                                                                                                                                                                                                                                                                                                                              | <a href="#">NRTN</a>                         | <a href="#">4902</a>                 |
| 187 | TC1400752 | <a href="#">Info</a> | granzyme H (cathepsin G-like 2, protein h-CCPX) // Granzyme H precursor (EC 3.4.21.-) (Cytotoxic T-lymphocyte proteinase) (Cathepsin G-like 2) (CTSG2) (CCP-X) (Cytotoxic serine protease C) (CSP-C). [Source:Uniprot/SWISSPROT;Acc:P20718]                                                                                                            | <a href="#">GZMH</a>                         | <a href="#">2999</a>                 |
| 188 | TC1500110 | <a href="#">Info</a> | small nucleolar RNA, C/D box 115-42 (SNORD115-42) on chromosome 15 [Source:RefSeq_dna;Acc:NR_003357]                                                                                                                                                                                                                                                   | <a href="#">NR_003357.1</a>                  |                                      |
| 189 | TC0601721 | <a href="#">Info</a> | T-cell activation RhoGTPase activating protein                                                                                                                                                                                                                                                                                                         | <a href="#">TAGAP</a>                        | <a href="#">117289</a>               |
| 190 | TC0800004 | <a href="#">Info</a> | CDNA FLJ34353 fis, clone FEBRA2011665. [Source:Uniprot/SPTREMBL;Acc:Q8NB26]                                                                                                                                                                                                                                                                            | <a href="#">Q8NB26_HUMAN</a>                 |                                      |
| 191 | TC0901111 | <a href="#">Info</a> | Protein HFSE-1. [Source:Uniprot/SWISSPROT;Acc:O75562]                                                                                                                                                                                                                                                                                                  | <a href="#">C9orf33</a>                      |                                      |
| 192 | TC1700899 | <a href="#">Info</a> | Succinate dehydrogenase complex, subunit C delta3+5 alternative splicing variant. [Source:Uniprot/SPTREMBL;Acc:Q3C259]                                                                                                                                                                                                                                 | <a href="#">Q3C259_HUMAN</a>                 |                                      |
| 193 | TC1000063 | <a href="#">Info</a> | optineurin // Optineurin (Optic neuropathy-inducing protein) (E3-14.7K-interacting protein) (FIP-2) (Huntingtin-interacting protein HYPL) (NEMO-related protein) (Transcription factor IIIA-interacting protein) (TFIIIA-IntP). [Source:Uniprot/SWISSPROT;Acc:Q96CV9]                                                                                  | <a href="#">OPTN</a>                         | <a href="#">10133</a>                |
| 194 | TC0X01008 | <a href="#">Info</a> | interleukin 2 receptor, gamma (severe combined immunodeficiency) // Cytokine receptor common gamma chain precursor (Gamma-C) (Interleukin-2 receptor gamma chain) (IL-2R gamma chain) (p64) (CD132 antigen). [Source:Uniprot/SWISSPROT;Acc:P31785]                                                                                                     | <a href="#">IL2RG</a>                        | <a href="#">3561</a>                 |
| 195 | TC2200682 | <a href="#">Info</a> | small nucleolar RNA, C/D box 43 (SNORD43) on chromosome 22 [Source:RefSeq_dna;Acc:NR_002439]                                                                                                                                                                                                                                                           | <a href="#">SNORD43</a>                      |                                      |
| 196 | TC0701762 | <a href="#">Info</a> | gastrulation brain homeobox 1                                                                                                                                                                                                                                                                                                                          | <a href="#">GBX1</a>                         | <a href="#">2636</a>                 |
| 197 | TC0103005 | <a href="#">Info</a> | tumor necrosis factor (ligand) superfamily, member 4 (tax-transcriptionally activated glycoprotein 1, 34kDa) // Tumor necrosis factor ligand superfamily member 4 (OX40 ligand) (OX40L) (Glycoprotein Gp34) (TAX transcriptionally-activated glycoprotein 1) (CD252 antigen). [Source:Uniprot/SWISSPROT;Acc:P23510]                                    | <a href="#">TNFSF4</a>                       | <a href="#">7292</a>                 |
| 198 | TC1101422 | <a href="#">Info</a> | olfactory receptor, family 1, subfamily S, member 2                                                                                                                                                                                                                                                                                                    | <a href="#">OR1S2</a>                        | <a href="#">219958</a>               |
| 199 | TC1101128 | <a href="#">Info</a> | hemoglobin, gamma G // hemoglobin, gamma A // hemoglobin, epsilon 1 // Hemoglobin subunit gamma-2 (Hemoglobin gamma-2 chain) (Gamma-2-globin) (Hemoglobin gamma-G chain) (Hb F Ggamma). [Source:Uniprot/SWISSPROT;Acc:P69892] // A-gamma globin [Source:RefSeq_peptide;Acc:NP_000550]                                                                  | <a href="#">HBG2 // HBG1 // HBE1 // HBG2</a> | <a href="#">3048 // 3047 // 3046</a> |
| 200 | TC1100645 | <a href="#">Info</a> | folate receptor 3 (gamma)                                                                                                                                                                                                                                                                                                                              | <a href="#">FOLR3</a>                        | <a href="#">2352</a>                 |
| 201 | TC1400690 | <a href="#">Info</a> | RAB2B, member RAS oncogene family // Ras-related protein Rab-2B. [Source:Uniprot/SWISSPROT;Acc:Q8WUD1]                                                                                                                                                                                                                                                 | <a href="#">RAB2B</a>                        | <a href="#">84932</a>                |
| 202 | TC0400924 | <a href="#">Info</a> | nuclear transcription factor, X-box binding-like 1 // NF-X1-type zinc finger protein NFXL1 (Ovarian zinc finger protein) (hOZFP). [Source:Uniprot/SWISSPROT;Acc:Q6ZNB6]                                                                                                                                                                                | <a href="#">NFXL1</a>                        | <a href="#">152518</a>               |
| 203 | TC0400395 | <a href="#">Info</a> | tigger transposable element derived 2                                                                                                                                                                                                                                                                                                                  | <a href="#">TIGD2</a>                        | <a href="#">166815</a>               |
| 204 | TC0301497 | <a href="#">Info</a> | poly (ADP-ribose) polymerase family, member 9                                                                                                                                                                                                                                                                                                          | <a href="#">PARP9</a>                        | <a href="#">83666</a>                |
| 205 | TC0X00341 | <a href="#">Info</a> | O-linked N-acetylglucosamine (GlcNAc) transferase (UDP-N-acetylglucosamine:polypeptide-N-acetylglucosaminyl transferase)                                                                                                                                                                                                                               | <a href="#">OGT</a>                          | <a href="#">8473</a>                 |
| 206 | TC1201605 | <a href="#">Info</a> | tescalcin // Tescalcin (TSC). [Source:Uniprot/SWISSPROT;Acc:Q96BS2]                                                                                                                                                                                                                                                                                    | <a href="#">TESC</a>                         | <a href="#">54997</a>                |
| 207 | TC1900960 | <a href="#">Info</a> | ribosomal protein S5                                                                                                                                                                                                                                                                                                                                   | <a href="#">RPS5</a>                         | <a href="#">6193</a>                 |
| 208 | TC1700273 | <a href="#">Info</a> | WD repeat and SOCS box-containing 1                                                                                                                                                                                                                                                                                                                    | <a href="#">WSB1</a>                         | <a href="#">26118</a>                |
| 209 | TC2000013 | <a href="#">Info</a> | proteasome (prosome, macropain) inhibitor subunit 1 (PI31) // Proteasome inhibitor PI31 subunit (hPI31). [Source:Uniprot/SWISSPROT;Acc:Q92530]                                                                                                                                                                                                         | <a href="#">PSMF1</a>                        | <a href="#">9491</a>                 |
| 210 | TC0X00273 | <a href="#">Info</a> | P antigen family, member 2B // P antigen family, member 2 (prostate associated) // Putative G antigen family E member 3 (Prostate-associated gene 2B protein) (PAGE-2B). [Source:Uniprot/SWISSPROT;Acc:Q5JRK9]                                                                                                                                         | <a href="#">PAGE2B // PAGE2 // PAGE2B</a>    | <a href="#">389860 // 203569</a>     |
| 211 | TC0900039 | <a href="#">Info</a> | CD274 molecule // Programmed cell death 1 ligand 1 precursor (Programmed death ligand 1) (PD-L1) (PDCD1 ligand 1) (B7 homolog 1) (B7-H1) (CD274 antigen). [Source:Uniprot/SWISSPROT;Acc:Q9NZQ7]                                                                                                                                                        | <a href="#">CD274</a>                        | <a href="#">29126</a>                |
| 212 | TC1100393 | <a href="#">Info</a> | serpin peptidase inhibitor, clade G (C1 inhibitor), member 1, (angioedema, hereditary) // Plasma protease C1 inhibitor precursor (C1 Inh) (C1Inh) (C1 esterase inhibitor) (C1-inhibiting factor). [Source:Uniprot/SWISSPROT;Acc:P05155]                                                                                                                | <a href="#">SERPING1</a>                     | <a href="#">710</a>                  |
| 213 | TC1900594 | <a href="#">Info</a> | immunity-related GTPase family, cinema                                                                                                                                                                                                                                                                                                                 | <a href="#">IRGC</a>                         | <a href="#">56269</a>                |
| 214 | TC1701428 | <a href="#">Info</a> | integrin, alpha 2b (platelet glycoprotein IIb of IIb/IIIa complex, antigen CD41) // Integrin alpha-IIb precursor (Platelet membrane glycoprotein IIb) (GPIIb) (GPIIb) (CD41 antigen) (Contains: Integrin alpha-IIb heavy chain; Integrin alpha-IIb light chain, form 1; Integrin alpha-IIb light chain, form 2). [Source:Uniprot/SWISSPROT;Acc:P08514] | <a href="#">ITGA2B</a>                       | <a href="#">3674</a>                 |
| 215 | TC0600726 | <a href="#">Info</a> | trace amine associated receptor 8                                                                                                                                                                                                                                                                                                                      | <a href="#">TAAR8</a>                        | <a href="#">83551</a>                |
| 216 | TC0300173 | <a href="#">Info</a> | similar to 40S ribosomal protein SA (p40) (34/67 kDa laminin receptor) (Colon carcinoma laminin-binding protein) (NEM/ICHD4) (Multidrug resistance-associated protein MGR1-Ag) // ribosomal protein SA // small nucleolar RNA, H/ACA box 62 (SNORA62) on chromosome 3 [Source:RefSeq_dna;Acc:NR_002324]                                                | <a href="#">LOC653162 // RPSA // SNORA62</a> | <a href="#">653162 // 3921</a>       |
| 217 | TC0300758 | <a href="#">Info</a> | ADP-ribosylation factor-like 14                                                                                                                                                                                                                                                                                                                        | <a href="#">ARL14</a>                        | <a href="#">80117</a>                |
| 218 | TC0600294 | <a href="#">Info</a> | major histocompatibility complex, class II, DQ alpha 1                                                                                                                                                                                                                                                                                                 | <a href="#">HLA-DQA1</a>                     | <a href="#">3117</a>                 |
| 219 | TC1200713 | <a href="#">Info</a> | 2'-5'-oligoadenylate synthetase 3, 100kDa                                                                                                                                                                                                                                                                                                              | <a href="#">OAS3</a>                         | <a href="#">4940</a>                 |

|     |           |                      |                                                                                                                                                                                                                                                                                               |                                    |                      |
|-----|-----------|----------------------|-----------------------------------------------------------------------------------------------------------------------------------------------------------------------------------------------------------------------------------------------------------------------------------------------|------------------------------------|----------------------|
| 220 | TC0200413 | <a href="#">Info</a> | vesicle-associated membrane protein 5 (myobrevin)                                                                                                                                                                                                                                             | VAMP5                              | 10791                |
| 221 | TC0X01204 | <a href="#">Info</a> | cancer/testis CT47 family, member 1 // cancer/testis CT47 family, member 11                                                                                                                                                                                                                   | RP6-166C19.1 // RP6-166C19.11      | 728096 // 255313     |
| 222 | TC0100269 | <a href="#">Info</a> | Rh blood group, D antigen // Blood group Rh(D) polypeptide (Rhesus D antigen) (RHXIII) (Rh polypeptide 2) (RhPII) (CD240D antigen). [Source:Uniprot/SWISSPROT;Acc:Q02161]                                                                                                                     | RHD                                | 6007                 |
| 223 | TC2000770 | <a href="#">Info</a> | secretory leukocyte peptidase inhibitor                                                                                                                                                                                                                                                       | SLPI                               | 6590                 |
| 224 | TC0501404 | <a href="#">Info</a> | colony stimulating factor 1 receptor, formerly McDonough feline sarcoma viral (v-fms) oncogene homolog                                                                                                                                                                                        | CSF1R                              | 1436                 |
| 225 | TC2100381 | <a href="#">Info</a> | CDNA FLJ16545 fis, clone OCBBF3004972. [Source:Uniprot/SPTREMBL;Acc:Q6ZN03]                                                                                                                                                                                                                   | Q6ZN03 HUMAN                       |                      |
| 226 | TC0202226 | <a href="#">Info</a> | trafficking protein, kinesin binding 2                                                                                                                                                                                                                                                        | TRAK2                              | 66008                |
| 227 | TC0300877 | <a href="#">Info</a> | small nucleolar RNA, H/ACA box 4 (SNORA4) on chromosome 3 [Source:RefSeq_dna;Acc:NR_002588]                                                                                                                                                                                                   | SNORA4                             |                      |
| 228 | TC0600162 | <a href="#">Info</a> | butyrophilin, subfamily 3, member A3                                                                                                                                                                                                                                                          | BTN3A3                             | 10384                |
| 229 | TC0600574 | <a href="#">Info</a> | mannosidase, endo-alpha // Glycoprotein endo-alpha-1,2-mannosidase (EC 3.2.1.130) (Mandasein) (hEndo). [Source:Uniprot/SWISSPROT;Acc:Q5SR19]                                                                                                                                                  | MANEA                              | 79694                |
| 230 | TC0800164 | <a href="#">Info</a> | BCL2/adenovirus E1B 19kDa interacting protein 3-like // BCL2/adenovirus E1B 19 kDa protein-interacting protein 3-like (NIP3L) (NIP3-like protein X) (BCL2/adenovirus E1B 19 kDa protein-interacting protein 3A) (Adenovirus E1B19K-binding protein B5). [Source:Uniprot/SWISSPROT;Acc:O60238] | BNIP3L                             | 665                  |
| 231 | TC1700547 | <a href="#">Info</a> | integrin, beta 3 (platelet glycoprotein IIIa, antigen CD61)                                                                                                                                                                                                                                   | ITGB3                              | 3690                 |
| 232 | TC0X00797 | <a href="#">Info</a> | chromosome X open reading frame 20 // Uncharacterized protein CXorf20. [Source:Uniprot/SWISSPROT;Acc:Q8NDZ0]                                                                                                                                                                                  | CXorf20                            | 139105               |
| 233 | TC1900439 | <a href="#">Info</a> | free fatty acid receptor 1                                                                                                                                                                                                                                                                    | FFAR1                              | 2864                 |
| 234 | TC0900536 | <a href="#">Info</a> | olfactory receptor, family 1, subfamily L, member 3                                                                                                                                                                                                                                           | OR1L3                              | 26735                |
| 235 | TC0900351 | <a href="#">Info</a> | cathepsin L1 // Cathepsin L precursor (EC 3.4.22.15) (Major excreted protein) (MEP) [Contains: Cathepsin L heavy chain; Cathepsin L light chain]. [Source:Uniprot/SWISSPROT;Acc:P07111]                                                                                                       | CTSL1                              | 1514                 |
| 236 | TC0701613 | <a href="#">Info</a> | MGC27345 protein. [Source:Uniprot/SPTREMBL;Acc:Q8TAC0]                                                                                                                                                                                                                                        | Q8TAC0 HUMAN                       |                      |
| 237 | TC1100968 | <a href="#">Info</a> | cancer susceptibility gene HEPN1                                                                                                                                                                                                                                                              | HEPN1                              | 641654               |
| 238 | TC0600215 | <a href="#">Info</a> | Olfactory receptor, family 2, subfamily J, member 3. [Source:Uniprot/SPTREMBL;Acc:Q5SUJ7]                                                                                                                                                                                                     | Q5SUJ7 HUMAN                       |                      |
| 239 | TC0202410 | <a href="#">Info</a> | ADP-ribosylation factor-like 4C                                                                                                                                                                                                                                                               | ARL4C                              | 10123                |
| 240 | TC1600582 | <a href="#">Info</a> | haptoglobin // Haptoglobin precursor [Contains: Haptoglobin alpha chain; Haptoglobin beta chain]. [Source:Uniprot/SWISSPROT;Acc:P00738]                                                                                                                                                       | HP                                 | 3240                 |
| 241 | TC0201079 | <a href="#">Info</a> | DNA polymerase-transactivated protein 3. [Source:Uniprot/SPTREMBL;Acc:Q6STG2]                                                                                                                                                                                                                 | Q6STG2 HUMAN                       |                      |
| 242 | TC1100182 | <a href="#">Info</a> | MICAL C-terminal like                                                                                                                                                                                                                                                                         | MICALCL                            | 84953                |
| 243 | TC1200660 | <a href="#">Info</a> | t-complex 11 (mouse)-like 2                                                                                                                                                                                                                                                                   | TCP11L2                            | 255394               |
| 244 | TC1400363 | <a href="#">Info</a> | chromosome 14 open reading frame 45                                                                                                                                                                                                                                                           | C14orf45                           | 80127                |
| 245 | TC1500643 | <a href="#">Info</a> | high-mobility group nucleosome binding domain 1 pseudogene                                                                                                                                                                                                                                    | LOC643790                          | 643790               |
| 246 | TC1800262 | <a href="#">Info</a> | CNDP dipeptidase 2 (metallopeptidase M20 family) // Cytosolic non-specific dipeptidase (CNDP dipeptidase 2) (Glutamate carboxypeptidase-like protein 1). [Source:Uniprot/SWISSPROT;Acc:Q96KP4]                                                                                                | CNDP2                              | 55748                |
| 247 | TC0102710 | <a href="#">Info</a> | histone cluster 2, H2be                                                                                                                                                                                                                                                                       | HIST2H2BE                          | 8349                 |
| 248 | TC2200637 | <a href="#">Info</a> | parvalbumin                                                                                                                                                                                                                                                                                   | PVALB                              | 5816                 |
| 249 | TC1001261 | <a href="#">Info</a> | oligonucleotide/oligosaccharide-binding fold containing 1                                                                                                                                                                                                                                     | OBFC1                              | 79991                |
| 250 | TC0700830 | <a href="#">Info</a> | olfactory receptor, family 2, subfamily A, member 5                                                                                                                                                                                                                                           | OR2A5                              | 393046               |
| 251 | TC1100249 | <a href="#">Info</a> | chromosome 11 open reading frame 46                                                                                                                                                                                                                                                           | C11orf46                           | 120534               |
| 252 | TC1100181 | <a href="#">Info</a> | microtubule associated monooxygenase, calponin and LIM domain containing 2 // Protein MICAL-2. [Source:Uniprot/SWISSPROT;Acc:Q94851]                                                                                                                                                          | MICAL2                             | 9645                 |
| 253 | TC1900134 | <a href="#">Info</a> | resistin // Resistin precursor (Cysteine-rich secreted protein FIZZ3) (Adipose tissue-specific secretory factor) (ADSF) (C/EBP-epsilon-regulated myeloid-specific secreted cysteine-rich protein) (Cysteine-rich secreted protein A12-alpha-like 2). [Source:Uniprot/SWISSPROT;Acc:Q9HD89]    | RETN                               | 56729                |
| 254 | TC1400918 | <a href="#">Info</a> | spectrin, beta, erythrocytic (includes spherocytosis, clinical type 1) // Spectrin beta chain, erythrocyte (Beta-1 spectrin). [Source:Uniprot/SWISSPROT;Acc:P11277]                                                                                                                           | SPTB                               | 6710                 |
| 255 | TC0400459 | <a href="#">Info</a> | epidermal growth factor (beta-urogastrone)                                                                                                                                                                                                                                                    | EGF                                | 1950                 |
| 256 | TC0901369 | <a href="#">Info</a> | zer-1 homolog (C. elegans)                                                                                                                                                                                                                                                                    | ZER1                               | 10444                |
| 257 | TC1100105 | <a href="#">Info</a> | olfactory receptor, family 51, subfamily M, member 1                                                                                                                                                                                                                                          | OR51M1                             | 390059               |
| 258 | TC1400683 | <a href="#">Info</a> | olfactory receptor, family 5, subfamily AU, member 1                                                                                                                                                                                                                                          | OR5AU1                             | 390445               |
| 259 | TC0600295 | <a href="#">Info</a> | similar to HLA class II histocompatibility antigen, DQ(1) alpha chain precursor (DC-4 alpha chain) // major histocompatibility complex, class II, DQ alpha 2                                                                                                                                  | LOC731682 // HLA-DOA2              | 731682 // 3118       |
| 260 | TC0600185 | <a href="#">Info</a> | histone cluster 1, H2ag // histone cluster 1, H3h // histone cluster 1, H2ai                                                                                                                                                                                                                  | HIST1H2AG // HIST1H3H // HIST1H2AI | 8969 // 8357 // 8329 |
| 261 | TC0201473 | <a href="#">Info</a> | leucine-rich PPR-motif containing                                                                                                                                                                                                                                                             | LRPPRC                             | 10128                |
| 262 | TC0400314 | <a href="#">Info</a> | platelet factor 4 variant 1                                                                                                                                                                                                                                                                   | PF4V1                              | 5197                 |
| 263 | TC1101414 | <a href="#">Info</a> | translocase of inner mitochondrial membrane 10 homolog (yeast)                                                                                                                                                                                                                                | TIMM10                             | 26519                |
| 264 | TC1100041 | <a href="#">Info</a> | keratin associated protein 5-6                                                                                                                                                                                                                                                                | KRTAP5-6                           | 440023               |
| 265 | TC1500958 | <a href="#">Info</a> | Dmx-like 2                                                                                                                                                                                                                                                                                    | DMXL2                              | 23312                |
| 266 | TC1200181 | <a href="#">Info</a> | phosphodiesterase 3A, cGMP-inhibited                                                                                                                                                                                                                                                          | PDE3A                              | 5139                 |
| 267 | TC0300767 | <a href="#">Info</a> | serpin peptidase inhibitor, clade 1 (neuroserpin), member 1                                                                                                                                                                                                                                   | SERPINI1                           | 5274                 |
| 268 | TC0301022 | <a href="#">Info</a> | transmembrane protein 40 // Transmembrane protein 40. [Source:Uniprot/SWISSPROT;Acc:Q8WWA1]                                                                                                                                                                                                   | TMEM40                             | 55287                |
| 269 | TC0401465 | <a href="#">Info</a> | CDNA FLJ45035 fis, clone BRAWH3019594. [Source:Uniprot/SPTREMBL;Acc:Q6ZQT0]                                                                                                                                                                                                                   | Q6ZQT0 HUMAN                       |                      |

|     |           |                      |                                                                                                                                                                                                                                                                         |                                             |                                |
|-----|-----------|----------------------|-------------------------------------------------------------------------------------------------------------------------------------------------------------------------------------------------------------------------------------------------------------------------|---------------------------------------------|--------------------------------|
| 270 | TC0501408 | <a href="#">Info</a> | CD74 molecule, major histocompatibility complex, class II invariant chain                                                                                                                                                                                               | <a href="#">CD74</a>                        | <a href="#">972</a>            |
| 271 | TC0500509 | <a href="#">Info</a> | early growth response 1                                                                                                                                                                                                                                                 | <a href="#">EGR1</a>                        | <a href="#">1958</a>           |
| 272 | TC0900431 | <a href="#">Info</a> | Sec61 beta subunit                                                                                                                                                                                                                                                      | <a href="#">SEC61B</a>                      | <a href="#">10952</a>          |
| 273 | TC1101415 | <a href="#">Info</a> | ubiquitin-conjugating enzyme E2L 6                                                                                                                                                                                                                                      | <a href="#">UBE2L6</a>                      | <a href="#">9246</a>           |
| 274 | TC1700953 | <a href="#">Info</a> | chromosome 17 open reading frame 87 // DTFT5783. [Source:Uniprot/SPTREMBL;Acc:Q6UWF3]                                                                                                                                                                                   | <a href="#">C17orf87</a>                    | <a href="#">388325</a>         |
| 275 | TC1901515 | <a href="#">Info</a> | biliverdin reductase B (flavin reductase (NADPH))                                                                                                                                                                                                                       | <a href="#">BLVRB</a>                       | <a href="#">645</a>            |
| 276 | TC0800712 | <a href="#">Info</a> | Beta-defensin 109 precursor (Defensin, beta 109). [Source:Uniprot/SWISSPROT;Acc:Q30KR1]                                                                                                                                                                                 | <a href="#">DB109_HUMAN</a>                 |                                |
| 277 | TC0101127 | <a href="#">Info</a> | hypothetical LOC645676                                                                                                                                                                                                                                                  | <a href="#">LOC645676</a>                   | <a href="#">645676</a>         |
| 278 | TC0301247 | <a href="#">Info</a> | ribosomal protein L29                                                                                                                                                                                                                                                   | <a href="#">RPL29</a>                       | <a href="#">6159</a>           |
| 279 | TC1101938 | <a href="#">Info</a> | sialic acid acetyltransferase                                                                                                                                                                                                                                           | <a href="#">SIAE</a>                        | <a href="#">54414</a>          |
| 280 | TC0501022 | <a href="#">Info</a> | 5-hydroxytryptamine (serotonin) receptor 1A                                                                                                                                                                                                                             | <a href="#">HTR1A</a>                       | <a href="#">3350</a>           |
| 281 | TC1700827 | <a href="#">Info</a> | ring finger protein 213                                                                                                                                                                                                                                                 | <a href="#">RNF213</a>                      | <a href="#">57674</a>          |
| 282 | TC1200507 | <a href="#">Info</a> | YEATS domain containing 4                                                                                                                                                                                                                                               | <a href="#">YEATS4</a>                      | <a href="#">8089</a>           |
| 283 | TC0202149 | <a href="#">Info</a> | CDNA FLJ42639 fis, clone BRACE3024662. [Source:Uniprot/SPTREMBL;Acc:Q6ZVF4]                                                                                                                                                                                             | <a href="#">Q6ZVF4_HUMAN</a>                |                                |
| 284 | TC0300648 | <a href="#">Info</a> | SRY (sex determining region Y)-box 14                                                                                                                                                                                                                                   | <a href="#">SOX14</a>                       | <a href="#">8403</a>           |
| 285 | TC0701095 | <a href="#">Info</a> | JAZF zinc finger 1                                                                                                                                                                                                                                                      | <a href="#">JAZF1</a>                       | <a href="#">221895</a>         |
| 286 | TC1000590 | <a href="#">Info</a> | transcription factor 7-like 2 (T-cell specific, HMG-box) // Transcription factor 7-like 2 (HMG box transcription factor 4) (T-cell-specific transcription factor 4) (TCF-4) (hTCF-4). [Source:Uniprot/SWISSPROT;Acc:Q9NQB0]                                             | <a href="#">TCF7L2</a>                      | <a href="#">6934</a>           |
| 287 | TC0400247 | <a href="#">Info</a> | phosphoribosylaminoimidazole carboxylase, phosphoribosylaminoimidazole succinocarboxamide synthetase                                                                                                                                                                    | <a href="#">PAICS</a>                       | <a href="#">10606</a>          |
| 288 | TC0200153 | <a href="#">Info</a> | EH-domain containing 3 // EH domain-containing protein 3. [Source:Uniprot/SWISSPROT;Acc:Q9NZN3]                                                                                                                                                                         | <a href="#">EHD3</a>                        | <a href="#">30845</a>          |
| 289 | TC0201443 | <a href="#">Info</a> | splicing factor, arginine/serine-rich 7, 35kDa // Splicing factor, arginine/serine-rich 7 (Splicing factor 9G8). [Source:Uniprot/SWISSPROT;Acc:Q16629]                                                                                                                  | <a href="#">SFRS7</a>                       | <a href="#">6432</a>           |
| 290 | TC0301580 | <a href="#">Info</a> | RAB6B, member RAS oncogene family                                                                                                                                                                                                                                       | <a href="#">RAB6B</a>                       | <a href="#">51560</a>          |
| 291 | TC0600173 | <a href="#">Info</a> | histone cluster 1, H2ag                                                                                                                                                                                                                                                 | <a href="#">HIST1H2AG</a>                   | <a href="#">8969</a>           |
| 292 | TC1001041 | <a href="#">Info</a> | pyrophosphatase (inorganic) 1 // Inorganic pyrophosphatase (EC 3.6.1.1) (Pyrophosphate phospho- hydrolase) (PPase). [Source:Uniprot/SWISSPROT;Acc:Q15181]                                                                                                               | <a href="#">PPA1</a>                        | <a href="#">5464</a>           |
| 293 | TC1400545 | <a href="#">Info</a> | small nucleolar RNA, C/D box 114-19 (SNORD114-19) on chromosome 14 [Source:RefSeq_dna;Acc:NR_003212]                                                                                                                                                                    | <a href="#">NR_003212.1</a>                 |                                |
| 294 | TC0X01402 | <a href="#">Info</a> | chloride intracellular channel 2 // Chloride intracellular channel protein 2 (XAP121). [Source:Uniprot/SWISSPROT;Acc:O15247]                                                                                                                                            | <a href="#">CLIC2</a>                       | <a href="#">1193</a>           |
| 295 | TC0200838 | <a href="#">Info</a> | dehydrogenase/reductase (SDR family) member 9                                                                                                                                                                                                                           | <a href="#">DHRS9</a>                       | <a href="#">10170</a>          |
| 296 | TC0X00139 | <a href="#">Info</a> | LanC lantibiotic synthetase component C-like 3 (bacterial) // LanC-like protein 3. [Source:Uniprot/SWISSPROT;Acc:Q6ZV70]                                                                                                                                                | <a href="#">LANCL3</a>                      | <a href="#">347404</a>         |
| 297 | TC0Y00143 | <a href="#">Info</a> | ubiquitously transcribed tetratricopeptide repeat gene, Y-linked // Ubiquitously transcribed Y chromosome tetratricopeptide repeat protein (Ubiquitously transcribed TPR protein on the Y chromosome). [Source:Uniprot/SWISSPROT;Acc:O14607]                            | <a href="#">UTY</a>                         | <a href="#">7404</a>           |
| 298 | TC0301757 | <a href="#">Info</a> | arylacetamide deacetylase-like 1                                                                                                                                                                                                                                        | <a href="#">AADACL1</a>                     | <a href="#">57552</a>          |
| 299 | TC0600300 | <a href="#">Info</a> | major histocompatibility complex, class II, DP beta 1 // HLA class II histocompatibility antigen, DP(W4) beta chain precursor. [Source:Uniprot/SWISSPROT;Acc:P04440]                                                                                                    | <a href="#">HLA-DPB1</a>                    | <a href="#">3115</a>           |
| 300 | TC1400528 | <a href="#">Info</a> | small nucleolar RNA, C/D box 114-4 (SNORD114-4) on chromosome 14 [Source:RefSeq_dna;Acc:NR_003196]                                                                                                                                                                      | <a href="#">NR_003196.1</a>                 |                                |
| 301 | TC0800412 | <a href="#">Info</a> | carbonic anhydrase XIII                                                                                                                                                                                                                                                 | <a href="#">CA13</a>                        | <a href="#">377677</a>         |
| 302 | TC1200869 | <a href="#">Info</a> | DCP1 decapping enzyme homolog B (S. cerevisiae)                                                                                                                                                                                                                         | <a href="#">DCP1B</a>                       | <a href="#">196513</a>         |
| 303 | TC2000405 | <a href="#">Info</a> | RNA binding motif protein 38 // RNA-binding protein 38 (RNA-binding motif protein 38) (RNA-binding region-containing protein 1) (HSRNASEB) (ssDNA-binding protein SEB4) (CLL-associated antigen KW-5). [Source:Uniprot/SWISSPROT;Acc:Q9H0Z9]                            | <a href="#">RBM38</a>                       | <a href="#">55544</a>          |
| 304 | TC1101015 | <a href="#">Info</a> | junctional adhesion molecule 3                                                                                                                                                                                                                                          | <a href="#">JAM3</a>                        | <a href="#">83700</a>          |
| 305 | TC2000670 | <a href="#">Info</a> | E2F transcription factor 1                                                                                                                                                                                                                                              | <a href="#">E2F1</a>                        | <a href="#">1869</a>           |
| 306 | TC0101520 | <a href="#">Info</a> | ribosomal RNA processing 15 homolog (S. cerevisiae) // RRP15-like protein. [Source:Uniprot/SWISSPROT;Acc:Q9Y3B9]                                                                                                                                                        | <a href="#">RRP15</a>                       | <a href="#">51018</a>          |
| 307 | TC1101395 | <a href="#">Info</a> | olfactory receptor, family 5, subfamily M, member 9                                                                                                                                                                                                                     | <a href="#">OR5M9</a>                       | <a href="#">390162</a>         |
| 308 | TC0100916 | <a href="#">Info</a> | splicing factor, arginine/serine-rich 2, interacting protein // Neuroblastoma breakpoint family member 9. [Source:Uniprot/SWISSPROT;Acc:Q3BBW0] // Neuroblastoma breakpoint family member 10. [Source:Uniprot/SWISSPROT;Acc:Q6P3W6]                                     | <a href="#">SFRS2IP // NBPF20 // NBPF10</a> | <a href="#">9169</a>           |
| 309 | TC1700360 | <a href="#">Info</a> | chemokine (C-C motif) ligand 2                                                                                                                                                                                                                                          | <a href="#">CCL2</a>                        | <a href="#">6347</a>           |
| 310 | TC1400295 | <a href="#">Info</a> | methylenetetrahydrofolate dehydrogenase (NADP+ dependent) 1, methylenetetrahydrofolate cyclohydrolase, formyltetrahydrofolate synthetase                                                                                                                                | <a href="#">MTHFD1</a>                      | <a href="#">4522</a>           |
| 311 | TC1200005 | <a href="#">Info</a> | WNK lysine deficient protein kinase 1 // Serine/threonine-protein kinase WNK1 (EC 2.7.11.1) (Protein kinase with no lysine 1) (Protein kinase, lysine-deficient 1) (Kinase deficient protein) (Erythrocyte 65 kDa protein) (p65). [Source:Uniprot/SWISSPROT;Acc:Q9H4A3] | <a href="#">WNK1</a>                        | <a href="#">65125</a>          |
| 312 | TC1200217 | <a href="#">Info</a> | mitochondrial ribosomal protein S35 // 28S ribosomal protein S35, mitochondrial precursor (S35mt) (MRP-S35) (Mitochondrial ribosomal protein S28) (MRP-S28). [Source:Uniprot/SWISSPROT;Acc:P82673]                                                                      | <a href="#">MRPS35</a>                      | <a href="#">60488</a>          |
| 313 | TC0100290 | <a href="#">Info</a> | CD52 molecule                                                                                                                                                                                                                                                           | <a href="#">CD52</a>                        | <a href="#">1043</a>           |
| 314 | TC0600259 | <a href="#">Info</a> | HLA complex group 27 (HCG27), mRNA [Source:RefSeq_dna;Acc:NM_181717]                                                                                                                                                                                                    | <a href="#">NM_181717.2</a>                 |                                |
| 315 | TC1701277 | <a href="#">Info</a> | NS5ATP13TP1. [Source:Uniprot/SPTREMBL;Acc:Q6JHZ5]                                                                                                                                                                                                                       | <a href="#">Q6JHZ5_HUMAN</a>                |                                |
| 316 | TC1100435 | <a href="#">Info</a> | membrane-spanning 4-domains, subfamily A, member 14 // membrane-spanning 4-domains, subfamily A, member 7                                                                                                                                                               | <a href="#">MS4A14 // MS4A7</a>             | <a href="#">84689 // 58475</a> |
